# Supplementary material
Source: ML conference proceedings conference paper supplement (https://aclanthology.org/D19-6101)
Supplement: Attachment [file appendix.pdf › supp_45/appendix.pdf]

## **Appendix for : A Closer Look At Feature Space Data Augmentation For Few-Shot Intent Classification**

**Varun Kumar, Hadrien Glaude, Cyprien de Lichy, William Campbell**

Amazon Alexa

Cambridge, MA, USA

{kuvrun, hglaude, cllichy, cmpw}@amazon.com

### **A FSI experiment results for all intents**

In all tables, individual columns represent FSI results for an intent, and *Overall Mean* column, provides average accuracy for all intents' FSI simulations. Please scroll to next page for results tables.

| #               | Method   | Playlist            | Restaurant         | Weather            | Music               | Book                | Work                | Event               | Overall Mean        |
|-----------------|----------|---------------------|--------------------|--------------------|---------------------|---------------------|---------------------|---------------------|---------------------|
| No Augmentation |          | 82.63(5.11)         | 87.86(3.53)        | 84.51(1.3)         | 88.07(2.37)         | 96.81(2.94)         | 85.14(1.53)         | 87.19(3.31)         | 87.46(2.87)         |
| 100             | UPSAMPLE | 92.24(2.96)         | 97.7(0.67)         | 96.44(0.75)        | 94.57(1.1)          | 97.96(0.82)         | 89.61(3.01)         | 91.26(2.35)         | 94.26(1.66)         |
|                 | PERTURB  | <b>93.09</b> (2.55) | 97.41(0.92)        | 96.07(1.35)        | 94.39(1.13)         | 97.86(0.93)         | 89.36(2.76)         | 91.09(2.53)         | 94.18(1.74)         |
|                 | CVAE     | 92.4(3.66)          | 97.47(0.67)        | 96.49(1.07)        | 94.36(1.26)         | 97.71(1.1)          | 89.1(2.79)          | 91.2(2.22)          | 94.1(1.83)          |
|                 | LINEAR   | 92.61(3.02)         | 97.74(0.67)        | 96.44(0.77)        | 94.63(1.18)         | <b>97.97</b> (0.78) | <b>89.61</b> (3.05) | 91.53(2.34)         | <b>94.36</b> (1.69) |
|                 | EXTRA    | 92.36(3.0)          | 97.74(0.66)        | 96.41(0.77)        | 94.6(1.18)          | 97.97(0.78)         | 89.47(3.11)         | 91.51(2.3)          | 94.3(1.68)          |
|                 | DELTAR   | 87.07(4.67)         | 93.57(4.07)        | 91.0(4.23)         | 94.87(1.28)         | 97.66(1.42)         | 85.97(2.34)         | 89.11(3.84)         | 91.32(3.12)         |
|                 | DELTAS   | 92.64(4.49)         | <b>97.76</b> (0.7) | 96.41(1.25)        | <b>94.99</b> (0.92) | 97.83(0.99)         | 88.69(2.69)         | <b>91.64</b> (2.36) | 94.28(1.92)         |
| 512             | UPSAMPLE | 95.3(1.09)          | 98.0(0.64)         | 97.63(0.34)        | 95.57(0.87)         | 98.03(0.55)         | 92.0(1.49)          | 93.26(1.05)         | 95.68(0.86)         |
|                 | PERTURB  | 95.33(1.2)          | 97.94(0.6)         | 97.6(0.44)         | 95.5(0.91)          | 97.91(0.55)         | 92.03(1.78)         | 93.21(0.99)         | 95.65(0.92)         |
|                 | CVAE     | 95.46(1.12)         | 97.89(0.62)        | 97.54(0.43)        | 95.36(1.02)         | 97.93(0.7)          | 91.34(2.17)         | 92.73(1.19)         | 95.46(1.03)         |
|                 | LINEAR   | 95.39(1.1)          | <b>98.0</b> (0.64) | 97.67(0.36)        | 95.74(0.89)         | <b>98.04</b> (0.5)  | <b>92.61</b> (1.47) | 93.66(1.13)         | <b>95.87</b> (0.87) |
|                 | EXTRA    | 95.36(1.17)         | 98.0(0.64)         | 97.66(0.37)        | 95.74(0.88)         | 98.04(0.5)          | 92.29(1.52)         | 93.63(1.17)         | 95.82(0.89)         |
|                 | DELTAR   | 95.36(1.74)         | 97.81(0.69)        | 97.6(0.44)         | 95.9(0.97)          | 97.74(1.02)         | 90.27(3.44)         | 92.61(2.64)         | 95.33(1.56)         |
|                 | DELTAS   | <b>95.66</b> (1.18) | 97.96(0.59)        | <b>97.8</b> (0.45) | <b>95.91</b> (0.88) | 97.91(0.74)         | 92.26(2.57)         | <b>93.66</b> (0.86) | <b>95.88</b> (1.04) |

Table 1: IC accuracy on SNIPS dataset in the FSI setting ( $k = 10$ ), reported as *mean* (*SD*).

| #               | Method   | Directions          | Distance            | Arrival             | Duration            | Traffic             | Event               | Overall Mean        |
|-----------------|----------|---------------------|---------------------|---------------------|---------------------|---------------------|---------------------|---------------------|
| No Augmentation |          | 89.61(0.1)          | 89.94(0.09)         | 90.56(0.12)         | 81.74(0.13)         | 68.5(0.13)          | 67.39(0.11)         | 81.29(0.11)         |
| 100             | UPSAMPLE | 89.89(0.27)         | 93.64(0.87)         | 92.95(0.57)         | 84.28(3.45)         | 68.99(0.49)         | <b>76.26</b> (5.41) | <b>84.34</b> (1.84) |
|                 | PERTURB  | 89.82(0.24)         | 93.58(0.84)         | 92.81(0.55)         | <b>84.81</b> (3.77) | <b>69.15</b> (0.68) | 74.07(5.6)          | 84.04(1.95)         |
|                 | CVAE     | 89.91(0.32)         | 93.46(0.77)         | 92.7(0.67)          | 84.45(3.52)         | 69.11(0.9)          | 74.94(5.49)         | 84.1(1.94)          |
|                 | LINEAR   | <b>89.93</b> (0.24) | <b>93.65</b> (0.88) | <b>92.98</b> (0.57) | 84.2(3.44)          | 68.96(0.51)         | 76.12(5.77)         | 84.31(1.9)          |
|                 | EXTRA    | 89.88(0.27)         | 93.61(0.89)         | 92.96(0.59)         | 84.21(3.43)         | 68.94(0.46)         | 75.18(5.34)         | 84.13(1.83)         |
|                 | DELTAR   | 89.64(0.11)         | 92.57(1.3)          | 90.79(0.37)         | 81.72(0.12)         | 68.48(0.08)         | 68.63(2.59)         | 81.97(0.76)         |
|                 | DELTAS   | 89.88(0.34)         | 93.68(0.72)         | 92.6(0.76)          | 83.88(3.2)          | 68.93(0.67)         | 72.05(5.83)         | 83.5(1.92)          |
| 512             | UPSAMPLE | 91.93(0.48)         | 94.58(0.34)         | 93.99(0.31)         | 92.56(0.72)         | 75.84(2.19)         | 85.27(1.87)         | 89.03(0.99)         |
|                 | PERTURB  | 91.78(0.49)         | 94.58(0.43)         | 94.02(0.25)         | 92.53(0.87)         | <b>76.0</b> (2.27)  | 85.22(1.61)         | 89.02(0.99)         |
|                 | CVAE     | 91.85(0.52)         | 94.57(0.39)         | 94.0(0.34)          | 92.45(0.92)         | 74.91(2.73)         | 84.5(1.61)          | 88.71(1.09)         |
|                 | LINEAR   | 92.14(0.66)         | 94.6(0.35)          | 94.05(0.32)         | <b>92.78</b> (0.67) | <b>76.0</b> (2.49)  | 86.22(1.7)          | <b>89.3</b> (1.03)  |
|                 | EXTRA    | <b>92.11</b> (0.57) | 94.61(0.35)         | 94.04(0.29)         | 92.72(0.7)          | 75.79(2.45)         | 85.98(1.58)         | 89.21(0.99)         |
|                 | DELTAR   | 90.43(0.55)         | 94.54(0.35)         | 93.8(0.3)           | 86.64(4.38)         | 71.68(1.46)         | <b>86.55</b> (1.75) | 87.28(1.46)         |
|                 | DELTAS   | 91.83(0.47)         | <b>94.66</b> (0.4)  | <b>94.08</b> (0.24) | 92.31(1.45)         | 75.81(2.1)          | 86.23(2.08)         | 89.15(1.12)         |

Table 2: IC accuracy on FBDialog dataset in the FSI setting ( $k = 10$ ), reported as *mean* (*SD*).

| #               | Method   | Playlist            | Restaurant          | Weather             | Music               | Book                | Work                | Event               | Overall Mean        |
|-----------------|----------|---------------------|---------------------|---------------------|---------------------|---------------------|---------------------|---------------------|---------------------|
| No Augmentation |          | 96.0(1.69)          | 95.39(1.59)         | 96.41(1.18)         | 93.1(1.38)          | 97.79(0.77)         | 88.46(1.14)         | 93.49(0.87)         | 94.38(1.23)         |
| 100             | UPSAMPLE | 96.0(1.57)          | 95.87(1.26)         | <b>96.51</b> (1.04) | 93.19(1.25)         | 97.83(0.7)          | 88.63(1.21)         | 93.7(0.83)          | 94.53(1.12)         |
|                 | PERTURB  | 96.1(1.64)          | 95.7(1.23)          | 96.43(1.28)         | 93.33(1.1)          | 97.8(0.77)          | 88.56(1.32)         | 93.7(0.9)           | 94.52(1.18)         |
|                 | CVAE     | 96.07(1.46)         | <b>95.91</b> (1.43) | 96.43(1.31)         | 93.2(1.15)          | 97.83(0.78)         | 88.63(1.28)         | 93.66(0.86)         | 94.53(1.18)         |
|                 | LINEAR   | 96.0(1.57)          | 95.89(1.26)         | <b>96.51</b> (1.04) | 93.19(1.25)         | 97.83(0.7)          | 88.63(1.21)         | 93.7(0.83)          | 94.53(1.12)         |
|                 | EXTRA    | 96.0(1.57)          | 95.84(1.3)          | <b>96.51</b> (1.04) | 93.19(1.25)         | 97.83(0.7)          | 88.63(1.21)         | 93.7(0.83)          | 94.53(1.13)         |
|                 | DELTAR   | 96.09(1.51)         | 95.74(1.46)         | 96.44(1.29)         | <b>93.56</b> (0.95) | <b>97.86</b> (0.75) | <b>88.79</b> (1.25) | <b>93.86</b> (0.93) | <b>94.62</b> (1.16) |
|                 | DELTAS   | <b>96.11</b> (1.52) | 95.69(1.44)         | 96.46(1.29)         | 93.44(0.93)         | <b>97.86</b> (0.75) | 88.64(1.18)         | 93.76(0.89)         | 94.57(1.14)         |
| 512             | UPSAMPLE | 96.07(1.54)         | 96.09(1.2)          | 96.6(1.06)          | 93.5(1.14)          | <b>97.87</b> (0.69) | 88.73(1.23)         | 93.8(0.92)          | 94.67(1.11)         |
|                 | PERTURB  | 96.23(1.6)          | 96.17(1.23)         | 96.63(1.13)         | 93.49(1.03)         | 97.84(0.72)         | 88.6(1.3)           | 93.79(0.98)         | 94.68(1.14)         |
|                 | CVAE     | 96.14(1.46)         | 96.24(1.18)         | 96.63(1.06)         | 93.6(1.08)          | 97.87(0.75)         | 88.76(1.29)         | 93.87(0.98)         | 94.73(1.11)         |
|                 | LINEAR   | 96.07(1.54)         | 96.11(1.21)         | 96.6(1.06)          | 93.49(1.13)         | <b>97.87</b> (0.69) | 88.76(1.25)         | 93.8(0.92)          | 94.67(1.11)         |
|                 | EXTRA    | 96.07(1.54)         | 96.13(1.18)         | 96.6(1.06)          | 93.5(1.14)          | <b>97.87</b> (0.69) | 88.73(1.25)         | 93.8(0.92)          | 94.67(1.11)         |
|                 | DELTAR   | <b>96.29</b> (1.52) | <b>96.29</b> (1.34) | <b>96.71</b> (1.1)  | <b>93.87</b> (1.04) | 97.86(0.75)         | <b>89.11</b> (1.22) | <b>94.03</b> (0.89) | <b>94.88</b> (1.12) |
|                 | DELTAS   | 96.19(1.61)         | 96.2(1.23)          | 96.69(1.07)         | 93.61(0.96)         | 97.86(0.75)         | 88.84(1.28)         | 93.83(0.94)         | 94.74(1.12)         |

Table 3: IC accuracy on SNIPS dataset in the FSI setting, reported as *mean* (*SD*). The 10 seed examples are upsampled to 100 to train the feature extractor.
